# Supplementary material
Source: Elsevier journal article supplement (https://comptes-rendus.academie-sciences.fr/physique/article/10.1016/j.crhy.2011.06.007/file/attach/mmc1.pdf)
Supplement: mmc1 [file mmc1.pdf]

**La version juridique du Nanomonde**  
**S. Lacour**

Responsable de l'équipe "Normativités et nouvelles technologies"  
CECOJI (UMR 6224 CNRS-Université de Poitiers)  
27, rue Paul Bert - 94204 Ivry sur Seine

**Summary:** Nanosciences and nanotechnologies come into a pre-existing legal system. Their arrival, and how they are received are worthy of analysis. Such an effort shall at first include simply lexical considerations, in order to penetrate, via their origins, the traces of these specific objects into the territory of law. The goal of this article is to explore the effects of “nanos” in various legal fields, including their relevance to the principle of precaution, patent law, and the applicable laws for chemical substances.

**Résumé :** Les nanosciences et nanotechnologies viennent s’inscrire dans un système juridique préexistant. Les modalités de leur réception par le droit méritent d’être analysées. Pour mener à bien cet exercice, il convient, après avoir exclu la piste d’une recherche purement lexicale, d’explorer quelques-unes des traces que l’émergence de ces objets spécifiques laisse dans le territoire du droit. C’est ce que tente de faire cet article, en se penchant sur l’effet des « nanos » dans différents champs juridiques, allant du principe de précaution jusqu’au droit des brevets d’invention en passant par le droit applicable aux substances chimiques.

**Keywords :** Nanotechnology; regulation, legal system; principle of precaution; patent law

**Mots clefs :** Nanotechnologies ; réglementation ; système juridique; principe de précaution ; droit des brevets d’invention

Imaginéés, encouragées et conçues par et pour la société dans son ensemble, les sciences et technologies viennent s’intégrer dans les cadres normatifs<sup>1</sup> dont la société dispose. La pertinence de ces normes doit, dès lors, être réévaluée en tenant compte des spécificités des activités et objets nouveaux ainsi que des applications que ces objets suscitent ou laissent présager.

---

<sup>1</sup> Par cadre normatif on entend l’ensemble des normes, d’origines diverses (juridiques, mais aussi éthiques, techniques ou encore économiques) qui existent dans une société donnée.

Les nanosciences et nanotechnologies (N&N) ne font pas exception à cette règle. Bien au contraire, leur regroupement plus ou moins arbitraire<sup>2</sup>, par référence à une échelle spatiale, le nanomètre, élargit considérablement le champ des normes susceptibles d'être concernées par leur développement. Intrinsèquement interdisciplinaires et novatrices, potentiellement présentes dans tous les secteurs industriels ou presque, les « nanos » bousculent l'ensemble des acteurs impliqués à chaque étape du cycle de vie des « nanoproduits », dans leurs pratiques de recherche et développement tout comme dans leurs façons de vivre ensemble, de s'informer, dans leurs habitudes de fabrication et aussi de consommation.

Registre normatif parmi d'autres, le droit a vocation à répondre à une partie de ces questionnements, aux côtés de l'éthique, de la déontologie, des normes techniques ou d'autres formes normatives moins structurées. Erigé en système normatif, il devient un terrain d'observation privilégié des évolutions que subit la société qui le légitime.

Qu'en est-il, dès lors, du droit dans le monde des N&N ?

## **I- Le nano-droit ? Fausses pistes et méthode choisie**

Si, comme le souligne Marie-Angèle Hermitte, « *[la pensée du droit] redessine la réalité qui lui est fournie en forçant les objets des autres mondes à entrer dans la logique de ses catégories et de ses topographies* »<sup>3</sup>, comment ce monde est-il interprété par notre système juridique ? Pour répondre à cette question, plusieurs pistes sont envisageables. Certaines s'avèrent être des impasses, c'est sans doute le cas, en partie, de celle qui a consisté, en France, en la création d'un régime spécifique aux nanoparticules et nanomatériaux, qui demeure abscons à l'heure actuelle (a). D'autres méritent davantage d'approfondissements, prenant acte du défi que les N&N représentent aux yeux du droit pour tenter d'analyser les réponses de ce dernier (b).

### **a) « Inconnu à cette adresse »<sup>4</sup>. L'itinéraire des substances à l'état nanoparticulaire**

Pour tenter de saisir l'image que le nanomonde imprime dans notre système juridique, il convient, selon nous d'écarter la piste de la recherche lexicale. Peut-on trouver, dans notre arsenal juridique, des textes spécifiquement dédiés à ces objets ? Pendant longtemps, la réponse fut négative. Pour ce qui concerne le droit français, elle ne l'est plus depuis que les Lois dites « Grenelle »<sup>5</sup> ont, par deux fois, annoncé la prochaine obligation de déclaration des « substances à l'état nanoparticulaire »<sup>6</sup>, donnant au préfixe « nano » ses lettres de noblesses législatives. Néanmoins, il est tout aussi impossible d'affirmer que les articles de ces deux lois composent le droit des N&N qu'il était absurde, avant leur publication, de prétendre qu'elles échappaient à son emprise.

---

<sup>2</sup> L'échelle, bien sûr, n'a rien d'arbitraire dans le système métrique, mais le choix de ce paramètre pour regrouper un ensemble de recherches scientifiques et de technologies, lui, a été guidé avant tout par des considérations de politique scientifique et technologique, comme en témoignent les difficultés rencontrées, au plan normatif, dans la définition de ce champ. Voir notamment la norme DD CEN ISO/TS 27687:2009.

<sup>3</sup> Marie-Angèle Hermitte, « Le droit est un autre monde », Enquête, Les objets du droit, 1999, disponible en ligne à l'adresse <http://enquete.revues.org/document1553.html>, consulté le 07 octobre 2010.

<sup>4</sup> Nous empruntons, en forme d'hommage, les titres de nos sous-parties, respectivement, à Kressmann Taylor, Jonathan Franzen, Didier Van Cauwelaert, Michel Houellebecq et Pierre Jourde. Que les auteurs en soient remerciés.

<sup>5</sup> Respectivement Loi n°2009-967 du 3 août 2009 de programmation relative à la mise en oeuvre du Grenelle de l'environnement et Loi n°2010-788 du 12 juillet 2010 portant engagement national pour l'environnement.

<sup>6</sup> Les substances à l'état nanoparticulaire sont visées dans l'article de la loi de programmation et dans l'article 185 de la loi portant engagement national pour l'environnement.

Ces lois, dans les articles qu'elles consacrent à l'objet en cause, illustrent toutefois les difficultés ressenties par les pouvoirs publics quant à l'objet « nano ». Confrontés aux limites d'un vocabulaire pourtant abondamment déployé dans le cadre de leurs politiques scientifiques et technologiques, ces derniers ont fait usage d'un néologisme jusqu'ici obscur pour ses destinataires<sup>7</sup>, ajoutant à l'ensemble des N&N une couche supplémentaire de complexité et à leur cadre normatif une source d'insécurité juridique regrettable. L'intervention juridique française la plus visible<sup>8</sup> consiste donc, dans ce cas particulier, en la création *ex-nihilo* d'une nouvelle catégorie, celle des « substances à l'état nanoparticulaire », dont le régime exact reste à construire. L'existence juridique des N&N demeure parcellaire, c'est un euphémisme, et leur existence politique n'est pas clarifiée.

Une leçon, toutefois, peut être tirée de ce premier constat. Malgré une volonté évidente de répondre le plus largement possible et de façon spécifique à la question des effets éventuels des nanoparticules sur la santé et l'environnement, le législateur n'est parvenu, pour l'instant, qu'à créer, dans le monde du droit, un objet nouveau dont les contours très incertains ne couvrent qu'une infime partie de la problématique des N&N.

Un tel constat peut s'expliquer. Le cadre de l'intervention législative était en effet limité par les termes de la procédure qui lui a servi de support<sup>9</sup>. L'exigence « *prévenir ou anticiper dans une démarche d'expertise, de veille et de vigilance les risques liés aux produits, aux techniques et aux modifications de l'environnement en accompagnant l'innovation* »<sup>10</sup>, notamment dans le domaine des nanomatériaux, est venue des débats organisés entre parties-prenantes lors du « Grenelle de l'environnement ». Cette requête était accompagnée de la demande d'élaboration d'un cadre réglementaire pour l'évaluation et la régulation des produits mettant en œuvre des nanomatériaux et de création d'un groupe consultatif représentatif des différentes parties prenantes pour le suivi des actions adoptées en matière de nanotechnologies. La lecture attentive des documents publiés durant les étapes ultérieures du processus, menant au vote des deux lois dites « Grenelle »<sup>11</sup> permet de mesurer les évolutions que les pistes exposées ont subies. Les modalités de participation du public aux processus décisionnels en la matière ont été largement modifiées, de même que l'objet du cadre réglementaire réclamé, qui a successivement été les nanomatériaux, puis les nanoparticules et nanomatériaux, avant de devenir, en fin de compte, les « substances à l'état nanoparticulaire, en l'état ou contenues dans des mélanges sans y être liées, ou des matériaux destinés à rejeter de telles substances dans des conditions normales ou raisonnablement prévisibles d'utilisation » dans la loi votée en juillet 2010.

Il était toutefois difficilement concevable, dans des textes législatifs issus d'une telle procédure, de prétendre réglementer l'ensemble du champ potentiellement concerné par les N&N.

---

<sup>7</sup> La notion de substance à l'état nanoparticulaire n'est en effet pas issue du vocabulaire juridique, pas plus qu'elle n'a de sens, en tant que telle, répertorié dans celui des nanosciences. L'emploi du mot « nanomatériaux » aurait sans aucun doute été préférable à la création d'un vocable particulier. On peut aussi se référer à l'article d'Eric Gaffet qui décrit les tentatives en cours pour normaliser ces termes.

<sup>8</sup> Sur l'idée que le registre normatif des nanotechnologies est bien présent, mais parfois moins visible, on peut se référer à « La régulation des nanotechnologies. Clair-obscur normatif », sous la direction de S. Lacour, Editions Larcier, 2010.

<sup>9</sup> Le Grenelle de l'Environnement est un processus qui a réuni, dès le 6 juillet 2007, l'Etat et les représentants de la société civile afin de définir une feuille de route en faveur de l'écologie, du développement et de l'aménagement durables. Ses 6 groupes de travail ont été constitués de représentants de 5 collèges qui avaient pour vocation de représenter les acteurs du développement durable : l'Etat, les collectivités locales, les ONG, les employeurs et les salariés.

<sup>10</sup> Le groupe de travail n°3, intitulé « Instaurer un environnement respectueux de la santé », a rendu son rapport le 27 septembre 2007. Ce groupe rassemblait des représentants d'ONG, de l'Etat, des salariés, des employeurs, des collectivités territoriales ainsi que de quelques personnes morales associées.

<sup>11</sup> Synthèse des travaux du groupe, tables rondes générales, préparation des projets de lois, travaux parlementaires...

## b) « *La zone d'inconfort* ». Réflexions sur un cadre en cours de construction.

Le champ des N&N est potentiellement immense. Le concept même de nanotechnologies a été façonné, dans le courant des années 1990, dans une perspective très englobante, par la communauté scientifique. Les autorités publiques, partout dans le monde, ont rapidement adopté ce mot-valise<sup>12</sup>, qui leur permet de réorienter de manière sensible leurs politiques scientifiques et technologiques tout en gardant une marge d'appréciation pour l'avenir. Un bon exemple en est la définition adoptée par la Commission européenne dans sa communication intitulée « Vers une stratégie européenne en faveur des nanotechnologies<sup>13</sup>, en 2004, de même que les éléments de contexte qu'elle met en avant dès les premières lignes du plan d'action qu'elle a publié en 2005<sup>14</sup>.

Face à une telle variété d'activités scientifiques et technologiques et à la diversité des champs d'application possibles, il semble que des pans entiers de notre système juridique soient potentiellement concernés par l'émergence des N&N, allant du droit de la recherche aux brevets d'inventions, du droit du travail au droit de l'environnement en passant par le droit fiscal ou encore le droit de la consommation, cette liste n'étant évidemment pas limitative. En outre, sous l'impulsion du droit communautaire, on a vu se multiplier des législations qui dépassent et mixent les disciplines et branches du droit, telles qu'un droit des aliments, le droit des cosmétiques ou encore le droit des substances chimiques, également concernés par les applications des nanotechnologies<sup>15</sup>. Au niveau européen, c'est d'ailleurs dans le cadre de ces législations sectorielles que la spécificité des N&N a été prise en considération jusqu'à présent<sup>16</sup>.

Pour tenter de déchiffrer et d'évaluer la pertinence de la traduction juridique du monde des N&N, c'est donc à une multiplicité de textes, mais aussi de branches du droit, de disciplines qu'il faut s'intéresser. Un tel programme, dont l'exhaustivité est évidemment exclue, suppose d'adopter une méthode claire. Pour cela, plusieurs voies nous semblent envisageables.

La première d'entre elles, mise en oeuvre avec succès dans le cadre de recherches en cours<sup>17</sup>, suggère de procéder à une analyse des dispositifs juridiques actionnés tout au long du cycle de vie des « nanoproduits ». Partant des laboratoires de recherche et aboutissant dans l'environnement, parfois sous forme de déchets, elle tente donc de dresser un panorama des étapes de ce cycle et des relations qu'entretiennent leurs différents cadres normatifs.

---

<sup>12</sup> L'imprécision de ce mot a d'ailleurs été dénoncée à de multiples reprises lors des débats organisés par la CNDP durant l'hiver 2009-2010, comme en témoigne le compte-rendu des débats publié par la Commission particulière du débat public qui les a organisés. Voir [http://debatpublic-nano.org/informer/bilan\\_debat.html](http://debatpublic-nano.org/informer/bilan_debat.html), notamment p. 24 de ce compte-rendu. Pour une analyse sociologique et politique de l'utilisation de ce terme, voir Brice Laurent, Les politiques des nanotechnologies, Pour un traitement démocratique d'une science émergente, Editions Charles Léopold Mayer, sept. 2010, particulièrement p. 26 et suivantes.

<sup>13</sup> Communication « Vers une stratégie européenne en faveur des nanotechnologies », COM (2004) 338.

<sup>14</sup> Communication « Nanosciences et nanotechnologies : un plan d'action pour l'Europe 2005-2009 », COM (2005)243. « *Les nanosciences et nanotechnologies (N&N) constituent de nouvelles approches de la recherche et développement (R&D) qui étudient les phénomènes et la manipulation de matériaux aux échelles atomique, moléculaire et macromoléculaire où la matière a des propriétés fort différentes de celles des plus grandes échelles. La R&D et l'innovation dans le domaine des N&N sont à l'origine de progrès dans un grand éventail de secteurs. Ces progrès peuvent apporter une réponse aux besoins des citoyens et contribuer à la compétitivité et aux objectifs de développement durable de l'Union ainsi qu'à un grand nombre de ses politiques comme la santé publique, la sécurité et l'hygiène du travail, la société de l'information, l'énergie, les transports, la sécurité et l'espace.* »

<sup>15</sup> Pour des développements illustrant cet effet du droit communautaire, dans le cas particulier de la protection des consommateurs, voir Sylvie PUGNET, « La réglementation de la sécurité des produits : un risque pour l'entreprise », Contrats Concurrence Consommation n° 10, Octobre 2009, étude 10. Voir également Camille Jauffret Spinosi, La structure du droit français, RIDC 2002, Volume 54, Numéro 2, particulièrement p. 271.

<sup>16</sup> Voir Règlement (CE) n°1223/2009 du 30 novembre 2009 relatif aux produits cosmétiques.

<sup>17</sup> Cette étude est actuellement menée dans le cadre du projet NanoNorma – De l'innovation à l'utilisation : quel cadre normatif pour les nano-objets ? – (<http://www.nanonorma.org/>), bénéficiant du soutien financier de l'Agence Nationale de la Recherche au titre du Programme National en Nanosciences et Nanotechnologies (n° ANR-08-NANO-001-01).

Nous tenterons ici une autre approche, consistant en un regroupement sommaire des branches du droit et textes juridiques concernés selon l'effet que l'émergence des nanotechnologies leur fait subir.

## **II-La réception des « nanos » par le droit. Effets choisis.**

Les N&N, selon les secteurs scientifiques, technologiques et industriels concernés, suscitent dans le monde juridique des effets allant d'une accentuation de questionnements préexistants jusqu'à une remise en cause profonde des principes et méthodes employées, et sont parfois, du fait de leur spécificité, sources de confusion dans des champs juridiques pourtant récents. Ces distinctions ne sont évidemment pas perméables, et certains champs juridiques seront touchés par plusieurs de ces effets, mais elles nous permettront néanmoins de schématiser grossièrement les variantes perceptibles dans la réception des N&N par notre cadre juridique.

### **1- « Corps étranger». Les branches du droit face aux situations d'incertitude**

Le droit existant n'est pas démuné face à la problématique de l'incertitude<sup>18</sup>. En 2005, notre arsenal juridique a même été doté d'un principe constitutionnel<sup>19</sup>, le principe de précaution, destiné à répondre à l'hypothèse particulière du risque incertain. Une telle prise en considération n'était pour autant pas étrangère à notre système juridique auparavant. Le Code de l'environnement en portait mention depuis la Loi Barnier de 1995 dans son article L. 110-1, et le droit communautaire en a fait l'un de ses principes généraux<sup>20</sup>. Issu du droit international de l'environnement<sup>21</sup>, l'extension du principe de précaution au domaine des risques sanitaires est rapidement apparue comme une évidence<sup>22</sup>, même si son existence même et les conditions de sa mise en œuvre continuent, à l'heure actuelle, à faire l'objet de critiques<sup>23</sup>.

Ce principe trouve évidemment à s'appliquer dans le domaine des N&N, plus particulièrement en ce qui concerne les risques éventuels de dommages liés à la fabrication, l'utilisation, etc. des nanoparticules et nanomatériaux. Les autorités publiques ne l'ont pas oublié, et il est cité, directement ou indirectement, dans l'ensemble des textes – communications<sup>24</sup>, recommandations<sup>25</sup>,

---

<sup>18</sup> En ce sens, S. Desmoulin-Canselier et S. Lacour, Le droit à l'épreuve des nanotechnologies (ou les nanotechnologies à l'épreuve du droit), in "Les nanosciences. 4 - Nanotoxicologie et nanoéthique" dirigé par Marcel Lahmani, Francelyne Marano, et Philippe Houly, Editions Belin, 2010.

<sup>19</sup> En application de l'article 5 de la Charte de l'environnement promulguée le 1er mars 2005 et introduite dans le préambule de la Constitution de 1958, « lorsque la réalisation d'un dommage, bien qu'incertaine en l'état des connaissances scientifiques, pourrait affecter de manière grave et irréversible l'environnement, les autorités publiques veillent, par application du principe de précaution et dans leurs domaines d'attributions, à la mise en œuvre de procédures d'évaluation des risques et à l'adoption de mesures provisoires et proportionnées afin de parer à la réalisation du dommage».

<sup>20</sup> En ce sens, voir TPICE, 26 novembre 2002, affaire Artegodan : T-74/00, point 184 ; TPICE, 11 septembre 2002, affaire Alapharma : T-70/99, point 171.

<sup>21</sup> La reconnaissance de la portée juridique du principe de précaution fut d'abord internationale et environnementale, puisque le premier texte qui l'a clairement mentionné fut celui de la Déclaration sur l'Environnement et le Développement adoptée à Rio (Convention de Rio) en 1992, dans son 15ème principe.

<sup>22</sup> Voir Ch. Noiville, « Science, décision, action : trois remarques à propos du principe de précaution », Petites Affiches, 1<sup>er</sup>-2 novembre 2004, n° 218-219, p. 10.

<sup>23</sup> Parmi lesquelles les plus médiatisées sont peut-être celles de François Ewald, fondateur de l'observatoire du principe de précaution et de Maurice Tubiana, membre de l'académie des Sciences. Voir ainsi, à titre indicatif, F. Ewald, "Le principe de précaution oblige à exagérer la menace", Le Monde, 9 janvier 2010 ou encore M. Tubiana, in « Le principe de précaution : bilan de son application quatre ans après sa constitutionnalisation », Compte-rendu de l'audition publique du 1er octobre 2009 organisée par l'OPECST.

<sup>24</sup> Voir notamment la Communication « Aspects réglementaires des nanomatériaux » COM (2008) 366.

<sup>25</sup> Recommandation 2008/345/CE de la Commission européenne concernant un code de bonne conduite pour une recherche responsable en nanosciences et nanotechnologies du 7 février 2008.

avis d'agences ou comités d'experts<sup>26</sup> notamment – consacrés au développement des N&N depuis 2004 en Europe. Le principe impliquant la mise en œuvre de procédures d'évaluation des risques ainsi que l'adoption de mesures provisoires et proportionnées afin de parer à la réalisation d'un éventuel dommage, il est généralement évoqué dans ces textes pour appuyer la nécessité de financer des recherches sur les risques que les nanomatériaux pourraient engendrer pour la santé et l'environnement. Nous ne reviendrons pas ici sur les difficultés qui demeurent aujourd'hui pour que cette injonction fasse l'objet de mesures concrètes, dont on peut trouver mention dans les comptes-rendus des débats<sup>27</sup> organisés par la Commission Nationale du Débat Public à la demande du gouvernement sur les options générales en matière de développement et de régulation des nanotechnologies.

Malgré ces difficultés de mise en œuvre, l'extension du domaine du principe de précaution est perceptible, dans le domaine des N&N, puisque d'un principe destiné à encadrer l'activité des autorités publiques, y compris en tant qu'employeurs, il s'est parfois vu conférer une place dans le corps même du droit du travail, au risque de susciter des incohérences avec les dispositions spécifiques de ce dernier, qui utilisent traditionnellement, en ce qui concerne les aspects relatifs à la sécurité et la santé des travailleurs, le paradigme de la prévention, entendue de manière très large.

Conçu pour prendre en charge les risques incertains de dommages, le principe de précaution a en effet trouvé des défenseurs dans le domaine de la santé au travail. Des travailleurs étant désormais en contact, du fait de leurs employeurs, avec des nanoparticules et nanomatériaux, quelles sont les mesures de protection qu'il convient d'adopter à leur égard ? La question mérite d'autant plus d'être posée que les risques liés à ces nanomatériaux sont pour l'instant encore très incertains, même si les connaissances disponibles sur ce sujet s'accroissent<sup>28</sup>.

Dès lors, la mise en œuvre du principe de précaution, usuellement perçue en droit de la responsabilité comme une protection supplémentaire face à des risques qui étaient auparavant tout simplement ignorés, a pu être envisagée comme devant relayer, dans le cadre du droit social, les principes généraux de prévention des risques pour les travailleurs. En situation de travail comme dans le domaine de la santé publique ou de l'environnement, deux hypothèses devraient par conséquent être distinguées au regard des nanoparticules et nanomatériaux. Dans un premier cas, les risques liés à ces produits seraient connus et pour le moins probabilisables, et les mesures de prévention auraient vocation à s'appliquer. Dans la seconde hypothèse, ces risques demeureraient incertains en l'état des connaissances scientifiques sur les nanomatériaux, et c'est au principe de précaution qu'il conviendrait de se référer.

Une telle interprétation est perceptible dans diverses prises de positions auxquelles ont donné lieu la question des nanomatériaux au travail. En 2009, ainsi, le MEDEF<sup>29</sup> affirmait, dans un document récent<sup>30</sup>, que « *les entreprises qui veulent innover en utilisant les nanotechnologies doivent prendre les mesures de prévention et de précaution qui intègrent le niveau d'incertitude des connaissances.* ». En cela, le syndicat patronal rejoignait explicitement la position adoptée par le

---

<sup>26</sup> En France, le Comité de la Prévention et de la Précaution fut le premier à être saisi de la question des N&N, voir Avis du Comité de la Prévention et de la Précaution, Ministère de l'écologie et du développement durable, mai 2006, « Nanotechnologies, nanoparticules, quels dangers, quels risques ? ». Ce premier texte fut suivi de nombreux autres avis et recommandations, dont ceux de l'AFFSET en 2006, 2008 et 2010.

<sup>27</sup> Les cahiers d'acteurs et comptes-rendus de débats, ainsi que le bilan publié par la Commission Particulière du Débat Public à cette occasion sont toujours disponibles en lignes à l'adresse suivante : <http://www.debatpublic-nano.org>

<sup>28</sup> Nous renvoyons le lecteur à l'article d'Eric Gaffet dans ce même ouvrage pour plus de développements sur ce sujet.

<sup>29</sup> « Mouvement Des Entreprises de France ». Organisation regroupant les dirigeants des entreprises françaises.

<sup>30</sup> <http://www.debatpublic-nano.org>



Comité de la prévention et de la précaution en 2006, lorsqu'il affirmait qu'« *en l'absence de valeur limite d'exposition issue de la recherche toxicologique, le principe ALARA (as low as reasonably achievable - aussi bas qu'il est raisonnablement réalisable) doit être appliqué* ». Il mettait ainsi l'accent, à l'issue d'une série de préconisations tendant à la protection des travailleurs « *sans attendre la mise en évidence de la toxicité ou de l'innocuité des différentes nanoparticules* », sur le caractère proportionné de la mise en œuvre du principe de précaution.

Cette interprétation, toutefois, doit être comparée à la manière dont notre droit du travail interprète actuellement les principes généraux de prévention des risques pour les travailleurs. En droit français, le Code du travail prévoit en effet que « *l'employeur prend les mesures nécessaires pour assurer la sécurité et protéger la santé physique et mentale des travailleurs. Ces mesures comprennent : 1° Des actions de prévention des risques professionnels ; 2° Des actions d'information et de formation ; 3° La mise en place d'une organisation et de moyens adaptés. L'employeur veille à l'adaptation de ces mesures pour tenir compte du changement des circonstances et tendre à l'amélioration des situations existantes* ». Cette obligation de l'employeur est interprétée, depuis 2002 et les contentieux relatifs à l'amiante, comme une obligation de résultat<sup>31</sup>.

Qu'en est-il en présence d'un risque dont l'employeur connaît l'éventualité mais qui demeure, en l'état des connaissances scientifiques, incertain ? L'existence d'un tel risque, fut-il incertain, est en effet connue dans le domaine des nanoparticules et nanomatériaux. Suffirait-elle à mettre en jeu sa responsabilité ? Une réponse négative à cette question, qui ressort du domaine de la responsabilité civile ou administrative (selon le statut de l'employeur) doit-elle avoir une quelconque répercussion sur l'étendue des mesures de prévention qu'il est tenu de mettre en œuvre dans l'organisation du travail, et notamment sur la mention du risque au sein du document unique prévu par les articles R. 4121-1 et suivants du Code du travail ?

L'incertitude exclut-elle, de fait, les actions de prévention des risques professionnels que l'employeur doit mettre en jeu, ou bien signifie-t-elle, comme le suggèrent les travaux de l'AFSSET en 2008<sup>32</sup> ou encore du Haut Conseil pour la Santé Publique en 2009<sup>33</sup>, qu'aux mesures les plus strictes issues de l'application du droit du travail doivent, en présence de risques demeurant incertains, s'ajouter des mesures de précaution tendant, par exemple, à accentuer les obligations de veille scientifique que notre droit du travail met d'ores et déjà à la charge de l'employeur, voire justifier, comme pourraient le suggérer certaines interprétations jurisprudentielles récentes du principe de précaution<sup>34</sup>, que les salariés puissent valablement<sup>35</sup> évoquer, en l'absence même de lien de causalité scientifiquement établi, les craintes légitimes que suscitent les effets de ces produits pour se retirer<sup>35</sup> ?

---

<sup>31</sup> Soc., 28 février 2002, pourvois n° 00-13.172, n° 99-18.389, n° 99-17.201 : « *En vertu du contrat de travail le liant à son salarié, l'employeur est tenu envers celui-ci d'une obligation de sécurité de résultat, notamment en ce qui concerne les maladies professionnelles contractées par ce salarié du fait des produits fabriqués ou utilisés par l'entreprise ; le manquement à cette obligation a le caractère d'une faute inexcusable, au sens de l'article L. 452-1 du Code de la sécurité sociale, lorsque l'employeur avait ou aurait dû avoir conscience du danger auquel était exposé le salarié, et qu'il n'a pas pris les mesures nécessaires pour l'en préserver* ».

<sup>32</sup> AFSSET, Avis sur « Nanomatériaux et sécurité au travail », juillet 2008,

<http://www.afsset.fr/index.php?pageid=1686&parentid=229&ongletid=3929#contenu> (site consulté le 21 octobre 2010).

<sup>33</sup> Voir Avis du Haut Conseil de la santé publique « la sécurité des travailleurs lors de l'exposition aux nanotubes de carbone » du 7 janvier 2009, à l'adresse suivante : [http://www.hcsp.fr/docs/pdf/avisrapports/hcspa20090107\\_ExpNanoCarbone.pdf](http://www.hcsp.fr/docs/pdf/avisrapports/hcspa20090107_ExpNanoCarbone.pdf)

<sup>34</sup> Voir CA Versailles, 14<sup>ème</sup> ch., 4 février 2009, et le commentaire de Ph. Stoffel-Munck, « La théorie des troubles du voisinage à l'épreuve du principe de précaution : observations sur le cas des antennes relais », D. 2009, n°42, chron. p. 2917, notamment.

<sup>35</sup> Article L. 4131-1 du Code du travail.

Où placer le curseur dans l'interprétation d'un concept ou principe, ici le principe de précaution, importé d'une autre branche du droit ? On le perçoit aisément au travers de cet exemple, l'exercice n'est pas aisé. L'interprétation qui est donnée du principe de précaution dans son domaine d'élection pourrait en effet aboutir, dans ce cas, à un recul des mesures de protection de la santé et de la sécurité des travailleurs ou, au contraire, à un renforcement tel de ces mesures que toute commercialisation des N&N deviendrait illusoire.

Cette analyse pourrait être menée également dans d'autres domaines juridiques concernés par les N&N, tels que le droit des assurances, notamment, qui tire partie du caractère incertain du risque lié aux activités en N&N pour développer une lecture *de lege feranda*, c'est-à-dire en anticipant sur la loi à venir, du droit de la responsabilité. Mais tel n'est pas le seul effet que l'émergence de ces technologies a sur le droit existant. Dans d'autres domaines, en effet, ce sont les principes même d'application des textes juridiques qui sont remis en cause, comme en témoignent les récentes anicroches sur la question des risques liés aux nanomatériaux, entre la Commission et le Parlement européen.

## 2- « Les particules élémentaires » d'une bonne gestion des risques...

Dans un certain nombre de domaines, dont celui de la réglementation relative aux produits chimiques, la norme juridique peut être évaluée à la fois sous l'angle des principes qu'elle affirme et véhicule et des normes et documents techniques dérivés qui sont nécessaires à sa mise en œuvre. Ces normes et documents techniques font expressément partie de la nouvelle approche prônée depuis le milieu des années 1980 par la Commission européenne afin de mettre en place le marché intérieur<sup>36</sup>.

En matière de nanoparticules et nanomatériaux, comme le souligne Nathalie Hervé-Fournereau, « à la différence d'un encadrement exclusivement coercitif, les autorités publiques prônent le recours à une approche instrumentale intégrée et évolutive, conjuguant le recours aux approches volontaires, l'adoption de recommandations et de guides de bonnes pratiques et l'adaptation<sup>37</sup> », plutôt que l'élaboration d'une législation spécifique.

Cette approche se manifeste depuis 2004 par l'affirmation par la Commission européenne du fait que « globalement, l'on peut en conclure que la législation actuelle couvre dans une large mesure les risques relatifs aux nanomatériaux et que ces risques peuvent être gérés à l'aide du cadre législatif existant.[...]. [Toutefois] Les documents qui étaient la mise en œuvre, notamment en matière d'évaluation des risques, et qui ont été adoptés au titre de l'actuelle législation devront être révisés de manière à garantir qu'ils prennent dûment en considération les risques présentés par les nanomatériaux et exploitent au mieux les données disponibles<sup>38</sup>. »

Il semble donc possible d'affirmer, faisant suite aux travaux de la Commission européenne, que les « particules élémentaires », éléments du cadre normatif essentiels à la cohérence de la législation relative à la gestion des risques présentés par les nanomatériaux sont, du point de vue juridique, les documents techniques qui étaient l'application de la législation existante, sans qu'il soit nécessaire de se pencher sur le contenu de cette dernière elle-même.

<sup>36</sup> Politique de nouvelle approche entreprise en 1984 et objet d'une résolution du Conseil des communautés européennes en 1985 : Cons. CE, résolution 7 mai 1985 : JOCE n° C 136, 4 juin 1985, p. 1 à 9.

<sup>37</sup> N. Hervé-Fournereau, La sécurité sanitaire et environnementale vis-à-vis des nanomatériaux, in Dossier thématique « Droit et nanotechnologies », sous la direction de S. Lacour, Cahiers Droit, Sciences et Technologies n°1, CNRS éditions, p. 57 et suivantes.

<sup>38</sup> Communication de la Commission au Parlement européen, au Conseil et au Comité économique et social européen, COM(2008) 366 final, Aspects réglementaires des nanomatériaux.



Une telle interprétation des textes communautaires se heurte toutefois, avec permanence, à une vive opposition de la part du Parlement européen et de ses différentes commissions. Ce dernier, en effet, comme il l'affirme dans sa résolution du 24 avril 2009<sup>39</sup> « *n'adhère pas, en l'absence, dans le droit communautaire, de toute disposition visant de manière spécifique les nanomatériaux, aux déclarations de la Commission affirmant que a) la législation en vigueur couvre, dans son principe, les risques liés à ce type de matériaux, b) ni à l'idée selon laquelle la protection de la santé, de la sécurité et des besoins environnementaux doivent être en majeure partie renforcés grâce à l'amélioration de l'application de la législation en vigueur, dès lors qu'en raison de l'absence de données et de méthodes appropriées pour évaluer les nanomatériaux, ses services sont incapables de traiter ces risques.* ».

Cette divergence dans l'interprétation des textes trouve, en partie, son origine dans le cœur même des dispositifs réglementaires visés. Ainsi en est-il, en particulier, du règlement REACH<sup>40</sup>, qui vise à assurer un niveau élevé de protection de la santé humaine et de l'environnement autant que la libre circulation des substances chimiques dans le marché intérieur, en réglementant leur fabrication, leur mise sur le marché et leur utilisation. Il est juste de souligner que ce règlement est novateur en ce qu'il abolit la distinction établie de longue date entre substances existantes et substances nouvelles, mettant toutes les substances chimiques sur un pied d'égalité. Il l'est également en posant « *le principe qu'il incombe aux fabricants, aux importateurs et aux utilisateurs en aval de veiller à fabriquer, mettre sur le marché ou utiliser des substances qui n'ont pas d'effet nocif pour la santé humaine ou l'environnement*<sup>41</sup> ». Les limites du règlement en ce qui concerne les nanoparticules et nanomatériaux ont été abondamment commentées. La plus évidente d'entre elles, selon Patrick Thieffry, est que l'obligation d'enregistrement prévue par le texte ne vise que les produits chimiques fabriqués ou importés dans des quantités de plus d'une tonne par an et par fabricant/importateur<sup>42</sup>.

Sans entrer plus avant dans le détail des dispositions du règlement<sup>43</sup>, il est aisé de prendre appui sur ce premier argument, très souvent déployé, pour illustrer les difficultés auxquelles le système juridique est soumis lorsqu'il s'agit d'adapter la législation existante aux spécificités des nanoparticules et nanomatériaux. Il suffit, en effet, de constater que le seuil réglementaire de 1 tonne par an et par producteur (ou importateur) sera difficilement atteint sur le marché européen en ce qui concerne les nanoparticules et nanomatériaux, à de rares exceptions près, qui pourraient, en outre, dans certains cas, être contournées aisément par des ententes entre industriels du secteur. Le constat vaut bien entendu pour les seuils supérieurs prévus par le règlement, qui conditionnent le détail du dossier d'enregistrement selon une idée très simple : plus le produit chimique est introduit massivement sur le marché, plus les risques d'exposition sont grands et mieux on doit le connaître.

---

<sup>39</sup> Parlement Européen. Résolution du 24 avril 2009 sur les aspects réglementaires des nanomatériaux.

<sup>40</sup> Règlement (CE) n°1907/2006, concernant l'enregistrement, l'évaluation et l'autorisation des substances chimiques, ainsi que les restrictions applicables à ces substances (REACH). Voir E. Brosset, « Le règlement communautaire en matière de produits chimiques, petite explication de texte », RJE, n°1/2008, p.5.

<sup>41</sup> Article 1, § 3 du règlement (CE) n°1907/2006.

<sup>42</sup> P. Thieffry, La prise en compte du risque des nanoparticules et nanomatériaux. Information et réglementation en amont. Mise en perspective juridique, in « La régulation des nanotechnologies. Clair-obscur normatif », sous la direction de S. Lacour, Editions Larcier, 2010, p. 181-208.

<sup>43</sup> Pour lesquelles nous renverrons à d'autres travaux, Voir P. Thieffry, préc. , mais aussi N. Hervé-Fournereau, La sécurité sanitaire et environnementale vis-à-vis des nanomatériaux, préc. ou encore, du même auteur, « La régulation des nanotechnologies : des normes techniques aux normes tout court ou la nébuleuse normative », in « La régulation des nanotechnologies. Clair-obscur normatif », préc. p. 43-88

En dessous d'un certain seuil, selon la Commission, imposer une obligation d'enregistrement nuirait à la « *praticabilité du système* »<sup>44</sup>.

Un tel constat, néanmoins, masque selon nous l'ampleur des modifications qu'il convient d'apporter à ce texte si l'on souhaite qu'il prenne correctement en charge la mise sur le marché de nanoparticules et nanomatériaux. En effet, en l'occurrence, ce n'est pas parce que ces produits sont fabriqués ou importés dans de faibles quantités que le droit peine à les appréhender, c'est bel et bien parce que l'unité de mesure choisie pour fixer ces seuils est aberrante puisque les effets de ces produits particuliers sont liés à des facteurs tels que la distribution de tailles des particules ou matériaux qui les composent, comme le relèvent les experts du SCENIHR<sup>45</sup>, bien davantage qu'à leur masse.

Plus qu'un abaissement du seuil en question, c'est une réflexion sur les critères pertinents de mise en œuvre de la législation qui serait nécessaire pour que REACH ait du sens vis-à-vis des nanomatériaux. L'inadaptation du texte, ici, est, certes, perceptible dans les documents techniques qui appuient la mise en œuvre pratique du droit. Ainsi, à partir d'un seuil plus élevé, est-il réclamé du déposant qu'il fournisse, dans son dossier d'enregistrement, les résultats d'études toxicologiques et écotoxicologiques pertinentes dont il dispose, ainsi qu'un rapport sur la sécurité chimique, qui ne pourront s'appliquer valablement aux nanoparticules et nanomatériaux que si les normes techniques mises en œuvre pour procéder à ces études sont adaptées à l'évaluation des risques de ces produits. Or cette adaptation est loin d'être certaine aujourd'hui, comme en témoignent les travaux engagés au sein de l'OCDE et de l'ISO pour établir, en la matière, des guides techniques particuliers. Mais cette inadaptation, et les nécessaires évolutions subséquentes, concernent également le texte juridique lui-même, et les présupposés sur lesquels sont bâtis les principes qu'il affirme.

C'est d'une profonde remise en cause que les catégories construites pour appréhender les substances chimiques ont besoin afin de couvrir les nanoparticules et nanomatériaux. Derrière cette remise en cause se cachent, comme souvent, des enjeux importants quant aux parties prenantes choisies pour faire évoluer le cadre normatif et à la place que les pouvoirs publics souhaitent leur laisser pour exprimer des opinions divergentes. Cette fois, ce n'est pas l'importation d'un concept issu d'une autre branche du droit qui est en cause, mais la façon dont les principes juridiques ont été pensés –et pas uniquement mis en œuvre- au sein d'un ensemble législatif cohérent.

D'autres législations sectorielles, notamment celle des autorisations de mise sur le marché de médicaments, permettraient également d'éclairer cet effet de remise en cause profonde du fonctionnement du système juridique par les N&N de façon similaire.

### **3- « *Pays perdu* ». De la nanoélectronique aux brevets d'invention.**

Pour terminer ce rapide panorama de la traduction juridique en cours de constitution du Nanomonde, nous discuterons la dernière hypothèse, celle d'une accentuation des questionnements existants quant à la pertinence des modèles juridiques choisis pour répondre à des questions préalablement soulevées par l'émergence de technologies antérieures.

---

<sup>44</sup> COM(2003) 644 final – Proposition de règlement du PE et du Conseil concernant l'enregistrement, l'évaluation et l'autorisation des substances chimiques, ainsi que les restrictions applicables à ces substances.

<sup>45</sup> Acronyme pour « Scientific Committee on Emerging and Newly Identified Health Risks ». La Commission européenne a demandé à ce Comité d'experts de se prononcer sur la définition scientifique des nanomatériaux à des fins de régulation. Les travaux sont en cours à l'heure actuelle.

Dans deux champs juridiques particuliers, les N&N ont pour effet d'accentuer les questionnements d'ores et déjà suscités par les technologies antérieures, à un point tel que l'économie initiale de ces domaines semble parfois perdue. Il s'agit du droit des données à caractère personnel<sup>46</sup> et du droit des brevets d'invention.

Dans le premier cas, la nanoélectronique permet désormais la fabrication de composants robustes et puissants à des coûts de plus en plus dérisoires, et ouvre ainsi la voie à la production de masse des outils nécessaires à la mise en œuvre concrète de l'Internet des objets, technologie NFC<sup>47</sup> et puces RFID<sup>48</sup> notamment, suscitant une nouvelle fois la mise à l'épreuve du cadre juridique de la protection des données à caractère personnel<sup>49</sup>.

Fondée sur des principes d'information, de recueil du consentement des personnes dont les données sont traitées ou bien encore de finalité définie des traitements en question, une telle législation a en effet bien du mal à prendre en charge des objets invisibles, potentiellement éternels<sup>50</sup>. Si la question de traces laissées par chacun d'entre nous a évolué ces dernières années et fait l'objet de bien des travaux, elle demeure en grande partie envisagée à l'aune d'une démarche plus ou moins consciente des individus, qu'il s'agisse de biométrie ou encore de navigation sur Internet. Les caractéristiques des objets que la nanoélectronique rend possibles éloignent sensiblement le sujet des occurrences de communication qu'il engendre. Les objets, désormais, communiquent pour nous... et sur nous.

La CNIL, autorité française instituée par la loi « Informatique, et libertés » de 1978<sup>51</sup>, a réagi très tôt à ce sujet, publiant dès 2003 une communication particulièrement édifiante<sup>52</sup>. Mettant en avant les pièges de la RFID en matière de protection des données à caractère personnel, elle recommande de considérer, en toute hypothèse, les puces RFID comme des données soumises aux obligations de la loi française, et de tout mettre en œuvre pour obtenir rapidement les moyens de les désactiver facilement. Les diverses interventions de cette autorité<sup>53</sup> lors du débat public organisé par la CNDP sur les nanotechnologies prouvent néanmoins que ses vœux sont, pour l'instant, demeurés en grande partie lettre morte.

Au niveau européen, les positions exprimées sont moins nettement en faveur d'un encadrement généralisé de ces dispositifs électronique par le biais du droit des données à caractère personnel. La Commission européenne, soucieuse de préserver la compétitivité des Etats membres dans ce secteur, affiche néanmoins clairement, depuis 2007<sup>54</sup>, et plus encore depuis 2009<sup>55</sup>, la volonté d'appuyer la mise en œuvre de ces technologies sur « *un cadre législatif accordant aux citoyens des garanties efficaces en matière de valeurs fondamentales, santé, confidentialité des données et*

---

<sup>46</sup> En ce sens, S. Lacour, « *Ubiquitous computing* et Droit. L'exemple de la radio-identification », in « La sécurité de l'individu numérisé », L'Harmattan, 2009.

<sup>47</sup> Acronyme pour « Near Field Communication », technique permettant des échanges d'information sans contact.

<sup>48</sup> Acronyme pour « Radio-frequency identification » autre technique permettant des échanges d'information sans contact.

<sup>49</sup> En France, la Loi n°78-17 du 6 janvier 1978 relative à l'informatique, aux fichiers et aux libertés, maintes fois modifiée, déjà, pour prendre en compte les innovations technologiques et nouveaux usages de l'informatique, au niveau européen, la directive 95/46 CE du 24 octobre 1995, relative à la protection des personnes physiques à l'égard du traitement de données à caractère personnel.

<sup>50</sup> Les puces RFID peuvent fonctionner sans batterie, l'énergie permettant leur réponse provenant du champ électromagnétique de leur lecteur.

<sup>51</sup> Loi n°78/17 du 6 janvier 1978 relative à l'informatique, aux fichiers et aux libertés, modifiée par la loi relative à la protection des personnes physiques à l'égard des traitements de données à caractère personnel du 6 août 2004.

<sup>52</sup> Communication de M. Philippe Lemoine relative à la Radio-Identification (Radio-Tags ou RFIDs).

<sup>53</sup> Son cahier d'acteur est, à cet égard, instructif

<sup>54</sup> Communication de la Commission, L'identification par radiofréquence en Europe : vers un cadre politique, 15/03/2007, COM (2007)96 final

<sup>55</sup> Recommandation de la Commission du 12 mai 2009 sur la mise en œuvre des principes de respect de la vie privée et de protection des données dans les applications reposant sur l'identification par radiofréquences - 2009/387/CE.

*respect de la vie privée* ». Là encore, comme le rappelle le « groupe de l'article 29<sup>56</sup> », l'adaptation des usages et des législations aux possibilités ouvertes par les technologies émergentes ne pourra se faire qu'au prix d'une réflexion approfondie sur les interactions nécessaires entre la technique, qu'il s'agisse des composants nanoélectroniques et des possibilités qu'ils offrent ou de leur programmation, et le droit. Ce dernier ne pourra, seul, répondre aux enjeux qu'accroissent les nanotechnologies. Sa remise en cause, néanmoins, est profonde, et les méthodes suggérées pour son évolution, dont celle de la co-régulation avec les entreprises du secteur suggérée par la Commission européenne dans sa recommandation de 2009, peinent à prendre en compte les évolutions dont il devra tenir compte pour ne pas être réduit, à terme, à n'avoir qu'une valeur incantatoire dénuée de toute portée concrète<sup>57</sup>.

Dans le domaine des brevets, pour terminer, l'effet qu'ont les N&N est corrélé à un ensemble de facteurs que l'on peut résumer ainsi. Les recherches en N&N sont majoritairement le fait de laboratoires académiques<sup>58</sup>. Elles sont récentes<sup>59</sup>, à la pointe de la recherche, coûteuses<sup>60</sup> et souvent interdisciplinaires. Elles brouillent les frontières entre sciences et technologies et, *last but not least*, sont susceptibles de donner lieu à des applications dans de très nombreux secteurs industriels<sup>61</sup>. Chaque Etat espère trouver dans les brevets d'invention un retour sur investissement et le moyen d'assurer sa place dans une compétition internationale d'autant plus féroce que ces technologies nous promettent la révolution industrielle du 21<sup>ème</sup> siècle. Les chercheurs ont donc été sollicités, comme ils l'ont été dans le domaine des biotechnologies, pour déposer des demandes de brevets le plus tôt possible<sup>62</sup>. Les offices de brevets, quant à eux, font face à l'afflux de demandes de brevets portant sur des objets qu'ils ont beaucoup de mal à appréhender et qui sont difficiles à situer par rapport à un état de la technique d'autant moins stabilisé que le vocabulaire développé pour nommer les produits des N&N est encore très mouvant<sup>63</sup> et qu'il fait appel à des connaissances venant de champs disciplinaires mêlés<sup>64</sup>.

Les risques liés à ce type de situations ont été dénoncés très tôt, en particulier aux Etats-Unis. Il s'agissait à l'époque de tirer la sonnette d'alarme sur les dérives que les biotechnologies faisaient déjà courir au système des brevets d'invention<sup>65</sup>. Nombre de brevets ont en effet été délivrés trop largement, sur des objets ne présentant pas toujours les caractères de véritables inventions, et

---

<sup>56</sup> Le groupe de travail « article 29 » sur la protection des données a été institué en vertu de l'article 29 de la directive 95/46/CE du 24.10.1995 relative à la protection des personnes physiques à l'égard du traitement des données à caractère personnel et à la libre circulation des données, JOCE 23.11.1995, n°L281/31.

<sup>57</sup> Le groupe de l'article 29 a, le 13 juillet 2010, exigé une modification de la proposition formulée par les entreprises européennes dans le cadre de la procédure de corégulation suggérée en 2009. Cet épisode témoigne des difficultés rencontrées dans l'adaptation des comportements et normes associées aux possibilités offertes par le déploiement massif des RFID. Voir Groupe de travail « Article 29 » sur la protection des données à caractère personnel. Avis 5/2010 sur la proposition des entreprises relative au cadre d'évaluation de l'impact sur la protection des données et de la vie privée des applications reposant sur l'identification par radiofréquence (RFID) adopté le 13 juillet 2010, disponible sur [http://ec.europa.eu/justice/policies/privacy/docs/wpdocs/2010/wp175\\_en.pdf](http://ec.europa.eu/justice/policies/privacy/docs/wpdocs/2010/wp175_en.pdf).

<sup>58</sup> En ce sens, voir OCDE, Groupe de travail sur la Nanotechnologie, « Nanotechnology: an overview based on indicators and statistics », STI Working paper 2009/7, Statistical Analysis of Science, Technology and Industry.

<sup>59</sup> Les premiers articles estampillés N&N ont été publiés dans le courant des années 1980, mais il faudra attendre les années 1990 pour que le secteur explose vraiment.

<sup>60</sup> S. Lacour, « Le droit des brevets d'invention à l'épreuve des nanotechnologies », Techniques de l'ingénieur, janvier 2010.

<sup>61</sup> Voir Angela Hullmann, « *The economic development of nanotechnologies – An indicators based analysis* », p. 21 et suivantes, novembre 2006, article téléchargeable sur <http://cordis.europa.eu/nanotechnology>

<sup>62</sup> Voir Masatura Igami et Teruo Okasaki, « *Capturing Nanotechnology's Current State of Development via Analysis of Patents* », STI Working Paper, 2007/4, Statistical Analysis of Science, Technology and Industry, OECD.

<sup>63</sup> Voir Raj Bawa, *Patents and nanomedicine*, Future medicine, nanomedicine (2007), 2(3), 351- 374.

<sup>64</sup> L'USPTO a créé, en novembre 2004, une classe de dépôt n° 977 pour les nanotechnologies. L'Office européen des brevets a mis en place un système interne d'examen des antériorités spécifique dénommé Y01N.

<sup>65</sup> Celui-ci a été modélisé au sujet des brevets portant sur la recherche biomédicale en 1998 par M. A. Heller et R. S. Eisenberg, *Can Patents Deter Innovation? The Anticommons in Biomedical Research*, Science 1 May 1998:Vol. 280. no. 5364.

risquent, de ce fait, de paralyser les capacités d'innovation de tous et, à terme, la mise sur le marché de produits issus des nanotechnologies<sup>66</sup>.

Ce risque, connu des spécialistes de propriété intellectuelle sous le nom de tragédie des anti-communs, est renforcé ici par le fait que les capitaux-risqueurs hésitent à soutenir la R&D, suscitant le dépôt de davantage de brevets, censés prouver la viabilité de la technologie dont l'exploitation est souhaitée<sup>67</sup>. La capacité de nuisance d'une telle multiplication de brevets est en outre multipliée par le caractère générique des technologies en cause, qui pourrait paralyser les corrections que le marché a opéré dans le cadre de technologies antérieures<sup>68</sup>. Les « buissons de brevets<sup>69</sup> » et autres « brevets de barrage<sup>70</sup> » ont, de fait, jusqu'ici été compensés, parfois au détriment d'une certaine justice sociale, par des stratégies contractuelles différentes selon les secteurs industriels. A titre d'exemple, dans le domaine de l'électronique, ils ont donné naissance à des phénomènes de « pools de brevets<sup>71</sup> » et autres licences croisées, qui, sans être à l'abri des critiques, notamment sur le plan du droit de la concurrence<sup>72</sup>, présentaient l'avantage de contourner les barrages engendrés par un trop grand nombre de brevets sur les produits commercialisables. Dans le domaine pharmaceutique, la stratégie a, au contraire, consisté dans l'exercice plus classique du droit de propriété lié aux titres, aboutissant au rachat ou à la liquidation des concurrents plus faibles face aux risques judiciaires. Chaque secteur industriel a ainsi développé sa propre stratégie, qui se trouve aujourd'hui confrontée à celle d'autres acteurs tout aussi puissants et donne naissance, de ce fait, à des potentialités de conflits difficilement réductibles. La présence accrue d'acteurs publics (universités ou organismes de recherche) dans ce jeu de quilles complique encore le tableau en ajoutant à ces difficultés économiques le risque de voir les effets indésirables de ces perversions du système des brevets empiéter rapidement sur la diffusion de connaissances et de technologies qui pourraient être utiles à tous<sup>73</sup>.

Un droit des brevets qui, loin de promouvoir l'innovation, prospère au détriment de cette dernière et du partage des savoirs est une absurdité. Il est temps encore de prendre conscience des dérives dont il fait l'objet et que les N&N, par leurs spécificités, accentuent. Pour cela, il faut repenser, en conséquence, les équilibres fondamentaux des politiques de recherche et d'innovation actuelles qui ont progressivement détourné le droit des brevets d'invention de la fonction sociale qui avait guidé l'élaboration de son régime juridique.

---

<sup>66</sup> Voir C. Shapiro, *Navigating the Patent Thicket: Cross licences, Patent pools and Standard-Setting*, Conference on Innovation Policy and the Economy, p.1, March 2001, mais aussi Rémi Lallement, *Politique des brevets : l'enjeu central de la qualité, face à l'évolution des pratiques*, Horizons stratégiques, Revue trimestrielle du Centre d'analyse stratégique, n°7, Janvier-mars 2008.

<sup>67</sup> Annie Kahn, *Les brevets sont devenus des armes sophistiquées de guerre commerciale*, Le Monde, 26 février 2008.

<sup>68</sup> Voir M. van Velzen, *IP in nanomedicine – Perspective from an IP professional in industry*, World Patent Information 30 (2008) 294-299, p. 295

<sup>69</sup> L'image des buissons de brevets recouvre l'hypothèse d'une multitude de brevets délivrés sur des objets similaires, et qui empiètent partiellement les uns sur les autres, ce qui est théoriquement impossible.

<sup>70</sup> Autre figure connue des spécialistes de brevets d'invention, qui consiste à déposer des demandes de brevets trop larges et ayant pour unique fonction de bloquer l'avancée des concurrents sur un marché spécifique. De tels brevets sont également théoriquement interdits par le droit.

<sup>71</sup> Les pools de brevets sont des mécanismes contractuels de mise en commun, par différentes entreprises, de leurs titres de brevets, qui donnent lieu, selon des modalités toujours très spécifiques, à une exploitation commune par les membres du pool.

<sup>72</sup> Voir F. Violet, Retour sur les embuscades tendues par les « patent trolls », *Propriété industrielle* n°6, juin 2010, p. 13 et suivantes.

<sup>73</sup> A tel point qu'on a pu se demander, aux Etats-Unis, fort sérieusement, si les universités n'étaient pas des trolls de brevets. Voir M. A Lemley, "Are Universities Patent Trolls ?" *Stanford Public Law Working Paper* n° 980776.

## **Conclusion**

Bousculé, dans ses frontières, ses concepts et ses objectifs, par les nanotechnologies, le système juridique pourrait perdre de son efficacité. Une telle évolution se ferait au détriment d'une bonne prise en compte des effets sanitaires, environnementaux et sociaux des N&N et, nécessairement, au détriment de leur développement. Repenser nos politiques scientifiques et technologiques, nos stratégies et nos réponses juridiques aux questions qu'elles soulèvent est un programme d'ampleur. Le territoire du droit, néanmoins, pourrait s'en trouver anobli, plus sûrement qu'il ne l'est, à l'heure actuelle, par l'« invention » malheureuse des substances à l'état nanoparticulaire.
